# Supplementary material for: Genome-Wide Association Study Reveals Novel Powdery Mildew Resistance Loci in Bread Wheat
Source: MDPI journal article supplement (doi:10.3390/plants12223864), 2023-11-15
Supplement: s1 [file s1]

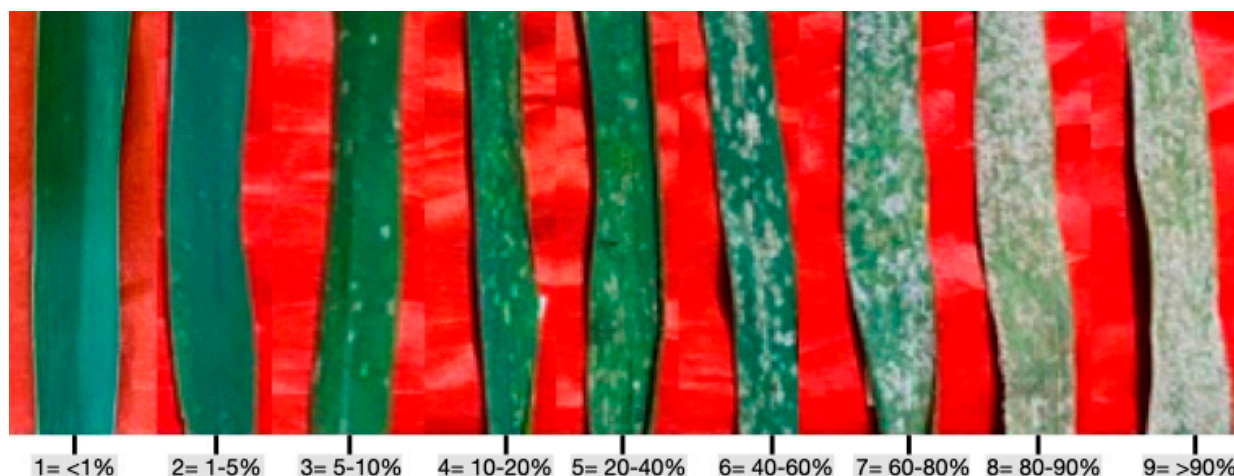

**Figure S1.** Disease severity assessment scale.

#### **Disease severity assessment:**

Disease severity was assessed using a rating scale ranging from 1 to 9 (Figure S1), following the method outlined by Bennett and Westcott [1], with some modifications. This scale encompasses level 1, indicating less than 1% severity, to level 9, denoting a severity exceeding 90%. Intermediate levels on the scale correspond to increasing disease severity.

#### **Reference**

Bennett, F.G.A.; Westcott, B. Field assessment of resistance to powdery mildew in mature wheat plants. *Plant Pathology* **1982**, *31*, 261-268, doi:<https://doi.org/10.1111/j.1365-3059.1982.tb01277.x>.
