# Supplementary material for: Genome-Wide Association Study Reveals Novel Powdery Mildew Resistance Loci in Bread Wheat
Source: Plants (Basel). 2023 Nov 15;12(22):3864. doi: 10.3390/plants12223864 (PMC10675159; doi:10.3390/plants12223864)
Supplement: Supplementary file 1 [file plants-12-03864-s001.zip › Supplementary File 1.xlsx]

## Sheet: Table S1
Table S1. Details of candidate genes identified in genomic intervals of marker trait associations detected during experimental years 2020-21, 2021-22 and 2022-23.
2020-21
Marker	Chromosome coordinates	Genomic interval	Candidate gene		Protein domins (Interpro description)
			Unique #	Identity
RAC875_c1710_376	1A:9003721:9203721	1	1	TraesCS1A02G017000	RNA recognition motif domain
					Nucleotide-binding alpha-beta plait domain superfamily
					RNPS1, RNA recognition motif
					RNA-binding domain superfamily
			2	TraesCS1A02G017100	RNA-binding domain superfamily
			3	TraesCS1A02G017300	Glutathione S-transferase, N-terminal
					Glutathione S-transferase, C-terminal
					Glutathione S-transferase, C-terminal-like
					Thioredoxin-like superfamily
					Glutathione S-transferase, C-terminal domain superfamily
					Glutathione Transferase family
					Glutathione S-transferase Omega/Tau-like
					Glutathione S-transferases Tau, C-terminal alpha helical domain, plant
			4	TraesCS1A02G017400	Glutathione S-transferase, N-terminal
					Glutathione S-transferase, C-terminal
					Glutathione S-transferase, C-terminal-like
					Thioredoxin-like superfamily
					Glutathione S-transferase, C-terminal domain superfamily
					Glutathione S-transferase Omega/Tau-like
					Glutathione S-transferases Tau, C-terminal alpha helical domain, plant
			5	TraesCS1A02G017500	Protein of unknown function DUF247, plant
Kukri_c35200_895	1A:459414896:459614896	2	6	TraesCS1A02G264200	Reticulon
BS00080318_51	2B:763742555:763942555	3	7	TraesCS2B02G574200	Reticulon
					Reticulon-like protein, plant
			8	TraesCS2B02G574300	Leucine-rich repeat domain superfamily
			9	TraesCS2B02G574500	Glutathione S-transferase, N-terminal
					Glutathione S-transferase, C-terminal-like
					Thioredoxin-like superfamily
					Glutathione S-transferase, C-terminal domain superfamily
					Glutathione S-transferase Omega/Tau-like
					Glutathione S-transferases Tau, C-terminal alpha helical domain, plant
Excalibur_c5438_274	2B:774858099:775058099	4	10	TraesCS2B02G587700	Protein of unknown function DUF6598
RAC875_rep_c83950_222	2B:774953184:775153184	5	11	TraesCS2B02G588100	Protein of unknown function DUF6598
			12	TraesCS2B02G588200	Protein of unknown function DUF6598
Excalibur_rep_c109577_698	2B:775268259:775468259	6	13	TraesCS2B02G588500	P-loop containing nucleoside triphosphate hydrolase
					Leucine-rich repeat domain superfamily
					Winged helix-like DNA-binding domain superfamily
					Virus X resistance protein-like, coiled-coil domain
					Rx, N-terminal
					Disease resistance protein, plants
			14	TraesCS2B02G588600	Thioredoxin domain
					Thioredoxin-like superfamily
			15	TraesCS2B02G588800	EGF-type aspartate/asparagine hydroxylation site
					Protein kinase domain
					EGF-like domain
					Serine-threonine/tyrosine-protein kinase, catalytic domain
					EGF-like calcium-binding domain
					Serine/threonine-protein kinase, active site
					Protein kinase-like domain superfamily
					Protein kinase, ATP binding site
					EGF-like calcium-binding, conserved site
					Wall-associated receptor kinase, galacturonan-binding domain
					Receptor-like kinase WAK-like
			16	TraesCS2B02G588900	Dihydroorotate dehydrogenase, conserved site
					Dihydroorotate dehydrogenase, class 2
					Dihydroorotate dehydrogenase domain
					Aldolase-type TIM barrel
Ra_c22493_190	6B:6096794:6296794	7	17	TraesCS6B02G010200	Leucine-rich repeat
					Leucine-rich repeat, typical subtype
					Leucine-rich repeat-containing N-terminal, plant-type
					Leucine rich repeat 4
					Leucine-rich repeat domain superfamily
Excalibur_c3795_198	6B:156166046:156366046	8	18	TraesCS6B02G152100	Domain of unknown function DUF547
					Ternary complex factor MIP1, leucine-zipper
					P-loop containing nucleoside triphosphate hydrolase
					DNA2/NAM7 helicase, helicase domain
					DNA2/NAM7 helicase-like, C-terminal
					DNA2/NAM7-like helicase
Excalibur_c7538_2718	7A:35502223:35702223	9	19	TraesCS7A02G069600	NB-ARC
					P-loop containing nucleoside triphosphate hydrolase
					Leucine-rich repeat domain superfamily
					Winged helix-like DNA-binding domain superfamily
					Rx, N-terminal
					Apoptotic protease-activating factors, helical domain
					Disease resistance protein, plants
			20	TraesCS7A02G069700	Glycoside hydrolase family 17
					Glycoside hydrolase superfamily
					Glycoside hydrolase family 17, plant
			21	TraesCS7A02G070000	Major facilitator, sugar transporter-like
					Major facilitator superfamily domain
					MFS transporter superfamily
wsnp_Ex_c35_77935	7A:41860564:42060564	10	22	TraesCS7A02G076500	PPC domain
					AT-hook motif nuclear-localized protein 15-29
			23	TraesCS7A02G076700	YEATS
					YEATS superfamily
2021-22
BS00011728_51	3B:58964340:59164340	11	24	TraesCS3B02G088900	PFTB repeat
					Terpenoid cyclases/protein prenyltransferase alpha-alpha toroid
					Geranylgeranyl transferase type-1 subunit beta
					Prenyltransferase subunit beta
			25	TraesCS3B02G089000	Protein-tyrosine phosphatase-like, PTPLA
			26	TraesCS3B02G089100	RlpA-like domain superfamily
					Kiwellin-like
			27	TraesCS3B02G089200	F-box domain
					F-box-like domain superfamily
			28	TraesCS3B02G089400	Protein translocase SecE domain superfamily
			29	TraesCS3B02G089500	Protein-tyrosine phosphatase-like, PTPLA
BS00022741_51	3B:66853509:67053509	12	30	TraesCS3B02G100500	Flavodoxin-like
					Oxidoreductase FAD/NAD(P)-binding
					Flavoprotein pyridine nucleotide cytochrome reductase
					Sulfite reductase [NADPH] flavoprotein alpha-component-like, FAD-binding
					Flavodoxin/nitric oxide synthase
					FAD-binding domain, ferredoxin reductase-type
					Riboflavin synthase-like beta-barrel
					NADPH-cytochrome p450 reductase, FAD-binding, alpha-helical domain superfamily
					NADPH-dependent diflavin oxidoreductase 1
					Flavoprotein-like superfamily
					Ferredoxin-NADP reductase (FNR), nucleotide-binding domain
Tdurum_contig51993_52	3B:66854023:67054023	12	30	TraesCS3B02G100500	Flavodoxin-like
					Oxidoreductase FAD/NAD(P)-binding
					Flavoprotein pyridine nucleotide cytochrome reductase
					Sulfite reductase [NADPH] flavoprotein alpha-component-like, FAD-binding
					Flavodoxin/nitric oxide synthase
					FAD-binding domain, ferredoxin reductase-type
					Riboflavin synthase-like beta-barrel
					NADPH-cytochrome p450 reductase, FAD-binding, alpha-helical domain superfamily
					NADPH-dependent diflavin oxidoreductase 1
					Flavoprotein-like superfamily
					Ferredoxin-NADP reductase (FNR), nucleotide-binding domain
Excalibur_c80041_400	3B:555959565:556159565	13	31	TraesCS3B02G346400	Conserved oligomeric Golgi complex subunit 1
			32	TraesCS3B02G346500	Aspartic peptidase A1 family
					Aspartic peptidase domain superfamily
					Xylanase inhibitor, C-terminal
					Xylanase inhibitor, N-terminal
					Peptidase family A1 domain
					Pepsin-like domain, plant
Kukri_c21818_519	3B:555959780:556159780	13	31	TraesCS3B02G346400	Conserved oligomeric Golgi complex subunit 1
			32	TraesCS3B02G346500	Aspartic peptidase A1 family
					Aspartic peptidase domain superfamily
					Xylanase inhibitor, C-terminal
					Xylanase inhibitor, N-terminal
					Peptidase family A1 domain
					Pepsin-like domain, plant
wsnp_Ku_c21818_31604716	3B:555991001:556191001	13	31	TraesCS3B02G346400	Conserved oligomeric Golgi complex subunit 1
			32	TraesCS3B02G346500	Aspartic peptidase A1 family
					Aspartic peptidase domain superfamily
					Xylanase inhibitor, C-terminal
					Xylanase inhibitor, N-terminal
					Peptidase family A1 domain
					Pepsin-like domain, plant
BobWhite_c27944_234	4A:104275678:104475678	14	33	TraesCS4A02G096200	tRNA methyltransferase, Trm1
					S-adenosyl-L-methionine-dependent methyltransferase
					tRNA methyltransferase, Trm1, C-terminal
Ex_c17894_1159	4A:105149095:105349095	15	34	TraesCS4A02G096600	Oxysterol-binding protein
					Oxysterol-binding protein, conserved site
					Oxysterol-binding protein superfamily
GENE-2637_94	4A:109331746:109531746	16	35	TraesCS4A02G097900	Heat shock protein 70 family
					Heat shock protein 70, conserved site
					Heat shock protein 70kD, peptide-binding domain superfamily
					Heat shock protein 70kD, C-terminal domain superfamily
					ATPase, nucleotide binding domain
IAAV3906	4A:110991261:111191261	17	36	TraesCS4A02G099100	NAD(P)-binding domain
					NAD(P)-binding domain superfamily
					UDP-glucuronic acid decarboxylase
			37	TraesCS4A02G099200	dTDP-glucose 4,6-dehydratase
					NAD(P)-binding domain
					RmlD-like substrate binding domain
					NAD(P)-binding domain superfamily
IACX1896	4A:113754919:113954919	18	38	TraesCS4A02G101400	Zinc finger, RING-type
					Zinc finger, RING/FYVE/PHD-type
					Nitric oxide synthase-interacting protein
					Nitric oxide synthase-interacting protein, zinc-finger
			39	TraesCS4A02G101500	PsbP, C-terminal
					Mog1/PsbP, alpha/beta/alpha sandwich
Kukri_c48155_158	4A:114644375:114844375	19	40	TraesCS4A02G102200	Ankyrin repeat
					PGG domain
					Ankyrin repeat-containing domain superfamily
			41	TraesCS4A02G102300	Ankyrin repeat
					PGG domain
					Ankyrin repeat-containing domain superfamily
RAC875_c22562_429	4A:115470013:115670013	20	42	TraesCS4A02G102700	Chromo/chromo shadow domain
					Bromo adjacent homology (BAH) domain
					C-5 cytosine methyltransferase
					Chromo-like domain superfamily
					DNA methylase, C-5 cytosine-specific, active site
					Chromo domain, conserved site
					Chromo domain
					S-adenosyl-L-methionine-dependent methyltransferase
					DNA methylase, C-5 cytosine-specific, conserved site
					Bromo adjacent homology (BAH) domain superfamily
			43	TraesCS4A02G102800	NA
RAC875_rep_c74695_101	4A:115694479:115894479	21	44	TraesCS4A02G102900	Protein kinase domain
					Serine-threonine/tyrosine-protein kinase, catalytic domain
					Serine/threonine-protein kinase, active site
					Protein kinase-like domain superfamily
					Protein kinase, ATP binding site
					Malectin-like domain
					Receptor-like protein kinase ANXUR1-like
wsnp_Ex_c10527_17198865	4A:120505031:120705031	22	45	TraesCS4A02G106300	Haem peroxidase
					Class I peroxidase
					Haem peroxidase superfamily
					Peroxidases heam-ligand binding site
					Peroxidase, active site
					Heme-binding peroxidase Ccp1-like
wsnp_Ex_c1387_2659020	4A:135258615:135458615	23	46	TraesCS4A02G110600	DnaJ domain
					DnaJ domain, conserved site
					Thioredoxin-like superfamily
					Chaperone J-domain superfamily
			47	TraesCS4A02G110700	NA
			48	TraesCS4A02G110800	Macro domain
					Histidine triad, conserved site
					Aprataxin-like
					P-loop containing nucleoside triphosphate hydrolase
					Aprataxin, C2HE/C2H2/C2HC zinc finger
					HIT-like superfamily
					Macro domain-like
wsnp_Ex_c1865_3515470	4A:136135380:136335380	24	49	TraesCS4A02G111000	Protein CHUP1-like
			50	TraesCS4A02G111100	Phosphoglycerate/bisphosphoglycerate mutase, active site
					Carbohydrate binding module family 20
					Fructose-2,6-bisphosphatase
					Histidine phosphatase superfamily, clade-1
					6-phosphofructo-2-kinase
					Immunoglobulin-like fold
					Carbohydrate-binding-like fold
					P-loop containing nucleoside triphosphate hydrolase
					Histidine phosphatase superfamily
			51	TraesCS4A02G111200	Myb/SANT-like DNA-binding domain 4
					Trihelix transcription factor ASIL1/2-like
			52	TraesCS4A02G111300	Myb/SANT-like DNA-binding domain 4
					Trihelix transcription factor ASIL1/2-like
wsnp_Ex_c36141_44153175	4A:136794495:136994495	25	53	TraesCS4A02G111800	CHCH
					NADH dehydrogenase [ubiquinone] (complex I), alpha subcomplex, subunit 8
			54	TraesCS4A02G112000	Rab3GAP catalytic subunit
					Rab3GAP catalytic subunit, conserved domain
			55	TraesCS4A02G112200	Fatty acid hydroxylase
wsnp_Ex_c43734_49968808	4A:164532278:164732278	26	56	TraesCS4A02G127600	F-box domain
					F-box-like domain superfamily
					F-box protein AUF1-like
wsnp_Ex_rep_c69890_68851948	4A:210900047:211100047	27	57	TraesCS4A02G139600	Ribosomal protein S21e
					Ribosomal protein S21e, conserved site
					Ribosomal protein S21e superfamily
Tdurum_contig51134_191	5A:698401228:698601228	28	58	TraesCS5A02G542800	Zinc finger C2H2-type
					Zinc finger C2H2 superfamily
					Zinc finger protein JAGGED/KNUCKLES-like
			59	TraesCS5A02G542400	GroES-like superfamily
					Alcohol dehydrogenase-like, C-terminal
					Alcohol dehydrogenase, N-terminal
					Polyketide synthase, enoylreductase domain
					NAD(P)-binding domain superfamily
			60	TraesCS5A02G542500	PRIB5
					Histidine phosphatase superfamily, clade-1
					Histidine phosphatase superfamily
			61	TraesCS5A02G542600	Sugar/inositol transporter
					Major facilitator, sugar transporter-like
					Sugar transporter, conserved site
					Major facilitator superfamily domain
					MFS transporter superfamily
					Sugar transport protein STP/MST-like, plant
					Sugar transport protein STP/Polyol transporter PLT, plant
			62	TraesCS5A02G542700	Protein kinase domain
					U-box domain
					Serine/threonine-protein kinase, active site
					Protein kinase-like domain superfamily
					Zinc finger, RING/FYVE/PHD-type
					Rossmann-like alpha/beta/alpha sandwich fold
					Protein kinase, ATP binding site
RAC875_c19099_308	5B:519053210:519253210	29	63	TraesCS5B02G336100	C2 domain
					Phospholipase D/Transphosphatidylase
					Phospholipase D, plant
					Phospholipase D family
					Phospholipase D, C-terminal
					C2 domain superfamily
Tdurum_contig53926_455	5B:516369300:516569300	30	64	TraesCS5B02G332500	Major intrinsic protein
					Major intrinsic protein, conserved site
					Aquaporin-like
					Aquaporin transporter
Kukri_c38732_225	6B:151031387:151231387	31	65	TraesCS6B02G149800	PAS domain
					F-box domain
					Galactose oxidase/kelch, beta-propeller
					Kelch-type beta propeller
					Adagio-like protein 2
					PAS domain superfamily
					F-box-like domain superfamily
Ra_c14852_1487	6B:156166570:156366570	8	18	TraesCS6B02G152100	Domain of unknown function DUF547
					Ternary complex factor MIP1, leucine-zipper
					P-loop containing nucleoside triphosphate hydrolase
					DNA2/NAM7 helicase, helicase domain
					DNA2/NAM7 helicase-like, C-terminal
					DNA2/NAM7-like helicase
BS00021686_51	6B:174466651:174666651	32	66	TraesCS6B02G166700	Protein of unknown function DUF3615
					PIR2-like, helical domain
Kukri_c25377_106	6B:174467929:174667929	32	66	TraesCS6B02G166700	Protein of unknown function DUF3615
					PIR2-like, helical domain
Ra_c77985_260	6B:213989373:214189373	33	67	TraesCS6B02G187500	Phosphoglycerate kinase
					Phosphoglycerate kinase, N-terminal
					Phosphoglycerate kinase, conserved site
					Phosphoglycerate kinase superfamily
BS00045761_51	6B:226970547:227170547	34	68	TraesCS6B02G192800	T-complex 11
BS00040868_51	6B:228877167:229077167	35	69	TraesCS6B02G194000	Non-structural maintenance of chromosome element 4, C-terminal
					Nse4/EID family
Excalibur_c5136_2314	6B:231577537:231777537	36	70	TraesCS6B02G195700	Sec7 domain
					Armadillo-like helical
					Mon2/Sec7/BIG1-like, HDS
					Armadillo-type fold
					Sec7, C-terminal domain superfamily
					Mon2/Sec7/BIG1-like, dimerisation and cyclophilin-binding domain
					Mon2/Sec7/BIG1-like, HUS domain
					Mon2, C-terminal
					Sec7 domain superfamily
					Sec7/BIG1-like, C-terminal domain
Excalibur_c79066_165	6B:232068465:232268465	37	71	TraesCS6B02G195900	NA
TA005139-0719	6B:234459694:234659694	38	72	TraesCS6B02G197300	S-adenosylmethionine synthetase
					S-adenosylmethionine synthetase, N-terminal
					S-adenosylmethionine synthetase, central domain
					S-adenosylmethionine synthetase, C-terminal
					S-adenosylmethionine synthetase, conserved site
					S-adenosylmethionine synthetase superfamily
RAC875_c12805_908	6B:234459907:234659907	38	72	TraesCS6B02G197300	S-adenosylmethionine synthetase
					S-adenosylmethionine synthetase, N-terminal
					S-adenosylmethionine synthetase, central domain
					S-adenosylmethionine synthetase, C-terminal
					S-adenosylmethionine synthetase, conserved site
					S-adenosylmethionine synthetase superfamily
BS00080544_51	6B:234460063:234660063	38	72	TraesCS6B02G197300	S-adenosylmethionine synthetase
					S-adenosylmethionine synthetase, N-terminal
					S-adenosylmethionine synthetase, central domain
					S-adenosylmethionine synthetase, C-terminal
					S-adenosylmethionine synthetase, conserved site
					S-adenosylmethionine synthetase superfamily
BobWhite_c32911_243	6B:255168901:255368901	39	73	TraesCS6B02G204600	Protein kinase domain
					Serine-threonine/tyrosine-protein kinase, catalytic domain
					Serine/threonine-protein kinase, active site
					Protein kinase-like domain superfamily
					Protein kinase, ATP binding site
					Receptor-like protein kinase SRF-like
			74	TraesCS6B02G204800	Aminoacyl-tRNA synthetase, class Ic
					Rossmann-like alpha/beta/alpha sandwich fold
					Tyrosine-tRNA ligase, archaeal/eukaryotic-type
GENE-2606_197	6B:257467774:257667774	40	75	TraesCS6B02G205500	Peptidase S10, serine carboxypeptidase
					Serine carboxypeptidase, serine active site
					Alpha/Beta hydrolase fold
					Serine carboxypeptidases, histidine active site
			76	TraesCS6B02G205600	Arabinogalactan protein 16/20/22/41
Excalibur_c20503_382	6B:257468556:257668556	40	75	TraesCS6B02G205500	Peptidase S10, serine carboxypeptidase
					Serine carboxypeptidase, serine active site
					Alpha/Beta hydrolase fold
					Serine carboxypeptidases, histidine active site
			76	TraesCS6B02G205600	Arabinogalactan protein 16/20/22/41
wsnp_Ra_c33358_42248399	6B:257893727:258093727	41	77	TraesCS6B02G205800	RNA recognition motif domain
					Nucleotide-binding alpha-beta plait domain superfamily
					RNA-binding domain superfamily
			78	TraesCS6B02G205900	ABC transporter-like, ATP-binding domain
					AAA+ ATPase domain
					ABC-2 type transporter
					Plant PDR ABC transporter associated
					P-loop containing nucleoside triphosphate hydrolase
					ABC-transporter, N-terminal domain
					ATP-binding cassette transporter, PDR-like subfamily G, domain 1
					ATP-binding cassette transporter, PDR-like subfamily G, domain 2
					ABC transporter family G domain
Excalibur_c53834_416	6B:257893802:258093802	41	77	TraesCS6B02G205800	RNA recognition motif domain
					Nucleotide-binding alpha-beta plait domain superfamily
					RNA-binding domain superfamily
			78	TraesCS6B02G205900	ABC transporter-like, ATP-binding domain
					AAA+ ATPase domain
					ABC-2 type transporter
					Plant PDR ABC transporter associated
					P-loop containing nucleoside triphosphate hydrolase
					ABC-transporter, N-terminal domain
					ATP-binding cassette transporter, PDR-like subfamily G, domain 1
					ATP-binding cassette transporter, PDR-like subfamily G, domain 2
					ABC transporter family G domain
BS00003955_51	6B:260448319:260648319	42	79	TraesCS6B02G206700	PAZ domain
					Piwi domain
					Ribonuclease H-like superfamily
					Argonaute, linker 1 domain
					Argonaute linker 2 domain
					Protein argonaute, Mid domain
					Protein argonaute, N-terminal
					PAZ domain superfamily
					Ribonuclease H superfamily
					Argonaute-like, PIWI domain
Ex_c49055_617	6B:260448488:260648488	42	79	TraesCS6B02G206700	PAZ domain
					Piwi domain
					Ribonuclease H-like superfamily
					Argonaute, linker 1 domain
					Argonaute linker 2 domain
					Protein argonaute, Mid domain
					Protein argonaute, N-terminal
					PAZ domain superfamily
					Ribonuclease H superfamily
					Argonaute-like, PIWI domain
wsnp_BQ161448B_Ta_2_1	6B:261430574:261630574	43	80	TraesCS6B02G207000	Very-long-chain 3-ketoacyl-CoA synthase
					FAE1/Type III polyketide synthase-like protein
					3-Oxoacyl-[acyl-carrier-protein (ACP)] synthase III, C-terminal
					Thiolase-like
			81	TraesCS6B02G207100	AAA+ ATPase domain
					ATPase, AAA-type, core
					ATPase, AAA-type, conserved site
					26S proteasome regulatory subunit P45-like
					P-loop containing nucleoside triphosphate hydrolase
					Proteasomal ATPase OB C-terminal domain
					26S proteasome regulatory subunit 8
					AAA ATPase, AAA+ lid domain
			82	TraesCS6B02G207200	Domain of unknown function DUF642
					Galactose-binding-like domain superfamily
BS00067871_51	6B:261485651:261685651	43	81	TraesCS6B02G207100	AAA+ ATPase domain
					ATPase, AAA-type, core
					ATPase, AAA-type, conserved site
					26S proteasome regulatory subunit P45-like
					P-loop containing nucleoside triphosphate hydrolase
					Proteasomal ATPase OB C-terminal domain
					26S proteasome regulatory subunit 8
					AAA ATPase, AAA+ lid domain
			82	TraesCS6B02G207200	Domain of unknown function DUF642
					Galactose-binding-like domain superfamily
BS00067873_51	6B:261485682:261685682	43	81	TraesCS6B02G207100	AAA+ ATPase domain
					ATPase, AAA-type, core
					ATPase, AAA-type, conserved site
					26S proteasome regulatory subunit P45-like
					P-loop containing nucleoside triphosphate hydrolase
					Proteasomal ATPase OB C-terminal domain
					26S proteasome regulatory subunit 8
					AAA ATPase, AAA+ lid domain
			82	TraesCS6B02G207200	Domain of unknown function DUF642
					Galactose-binding-like domain superfamily
wsnp_Ex_c23474_32717535	6B:276121225:276321225	44	83	TraesCS6B02G209400	NB-ARC
					Armadillo-like helical
					Armadillo-type fold
					P-loop containing nucleoside triphosphate hydrolase
					Winged helix-like DNA-binding domain superfamily
					Apoptotic protease-activating factors, helical domain
wsnp_Ra_rep_c111161_93528347	6B:277063269:277263269	45	84	TraesCS6B02G210100	Nucleoporin Nup186/Nup192/Nup205
wsnp_Ex_rep_c103497_88437811	6B:277065618:277265618	45	84	TraesCS6B02G210100	Nucleoporin Nup186/Nup192/Nup205
Kukri_c24148_254	7B:705170901:705370901	46	85	TraesCS7B02G439900	Elongator complex protein 4
					P-loop containing nucleoside triphosphate hydrolase
TA005284-0990	7B:704171881:704371881	47	86	TraesCS7B02G438100	Phox homology
					PX domain superfamily
					PX domain-containing protein EREX-like
			87	TraesCS7B02G438200	Ubiquitin system component CUE
					UBA-like superfamily
			88	TraesCS7B02G438300	NA
			89	TraesCS7B02G438400	Cytochrome P450
					Cytochrome P450, E-class, group I
					Cytochrome P450, conserved site
					Cytochrome P450 superfamily
wsnp_JD_c13673_13606066	7B:704171648:704371648	47	86	TraesCS7B02G438100	Phox homology
					PX domain superfamily
					PX domain-containing protein EREX-like
			87	TraesCS7B02G438200	Ubiquitin system component CUE
					UBA-like superfamily
			88	TraesCS7B02G438300	NA
			89	TraesCS7B02G438400	Cytochrome P450
					Cytochrome P450, E-class, group I
					Cytochrome P450, conserved site
					Cytochrome P450 superfamily
2022-23
IACX3595	1B:539462016:539662016	48	90	TraesCS1B02G314900	NOT2/NOT3/NOT5, C-terminal
					CCR4-NOT complex subunit 2/3/5, N-terminal domain superfamily
					Not2/Not3/Not5
Excalibur_c8284_580	3B:6818937:7018937	49	91	TraesCS3B02G016800	Chloramphenicol acetyltransferase-like domain superfamily
			92	TraesCS3B02G017000	Chloramphenicol acetyltransferase-like domain superfamily
Kukri_c2526_1375	4B:523347728:523547728	50	93	TraesCS4B02G257700	Ubiquitin system component CUE
					UBA-like superfamily
					Activating signal cointegrator 1 complex subunit 2, CUE domain
BS00094965_51	7A:669629091:669829091	51	94	TraesCS7A02G474200	Plant peroxidase
					Haem peroxidase
					Haem peroxidase superfamily
					Peroxidases heam-ligand binding site
					Peroxidase, active site
					Secretory peroxidase
			95	TraesCS7A02G474400	Plant peroxidase
					Haem peroxidase
					Haem peroxidase superfamily
					Peroxidases heam-ligand binding site
					Peroxidase, active site
					Secretory peroxidase
			96	TraesCS7A02G474700	GDSL lipase/esterase
					GDSL lipase/esterase-like, plant
					SGNH hydrolase superfamily

## Sheet: Table S2
Table S2. Details of defence and host-pathogen associated proteins encoded by candidate genes identified in genomic intervals of marker trait associations detected during this study.
Candidate gene		Protein	Protein domain(s)	Remark
Unique #	Identity
3	TraesCS1A02G017300	Glutathione S-transferase family protein	Glutathione S-transferase Omega/Tau-like	Enhance resistance to powdery mildew in wheat
			Glutathione S-transferase, C-terminal
			Glutathione S-transferase, C-terminal domain superfamily
			Glutathione S-transferase, C-terminal-like
			Glutathione S-transferase, N-terminal
			Glutathione S-transferases Tau, C-terminal alpha helical domain, plant
			Glutathione Transferase family
4	TraesCS1A02G017400	Glutathione S-transferase family protein	Glutathione S-transferase Omega/Tau-like	Enhance resistance to powdery mildew in wheat
			Glutathione S-transferase, C-terminal
			Glutathione S-transferase, C-terminal domain superfamily
			Glutathione S-transferase, C-terminal-like
			Glutathione S-transferase, N-terminal
			Glutathione S-transferases Tau, C-terminal alpha helical domain, plant
8	TraesCS2B02G574300	Disease resistance protein	Leucine-rich repeat domain superfamily protein	Disease resistance, defence response
9	TraesCS2B02G574500	Glutathione S-transferase family protein	Glutathione S-transferase Omega/Tau-like	Enhance resistance to powdery mildew in wheat
			Glutathione S-transferase, C-terminal domain superfamily
			Glutathione S-transferase, C-terminal-like
			Glutathione S-transferase, N-terminal
			Glutathione S-transferases Tau, C-terminal alpha helical domain, plant
13	TraesCS2B02G588500	Disease resistance protein	Disease resistance protein, plants	Defence response, ADP binding and hydrolase activity
			Leucine-rich repeat domain superfamily
			P-loop containing nucleoside triphosphate hydrolase
15	TraesCS2B02G588800	Serine/threonine-protein kinase	Protein kinase domain	Similar to Tan spot necrotrophic effector ToxA sensitivity gene Tsn1, involved in plant–pathogen interaction and defence responses
			Protein kinase-like domain superfamily
			Protein kinase, ATP binding site
			Serine/threonine-protein kinase, active site
			Wall-associated receptor kinase, galacturonan-binding domain
17	TraesCS6B02G010200	Disease resistance protein	Leucine rich repeat 4	Disease resistance, defence response
			Leucine-rich repeat
			Leucine-rich repeat domain superfamily
			Leucine-rich repeat-containing N-terminal, plant-type
			Leucine-rich repeat, typical subtype
18	TraesCS6B02G152100	Disease resistance protein-associated	P-loop containing nucleoside triphosphate hydrolase	Regulate activity of the R proteins, defence response
19	TraesCS7A02G069600	Disease resistance protein	Disease resistance protein, plants	Defence response, ADP binding and hydrolase activity
			Leucine-rich repeat domain superfamily
			NB-ARC
			P-loop containing nucleoside triphosphate hydrolase
27	TraesCS3B02G089200	F-box domain family protein	F-box domain	Regulates cell death and defence responses
			F-box-like domain superfamily
32	TraesCS3B02G346500	Aspartic peptidase A1 family protein	Aspartic peptidase A1 family	Defence response
			Aspartic peptidase domain superfamily
38	TraesCS4A02G101400	Zinc finger, RING-type protein	Zinc finger, RING-type	Involved in plant stress tolerance, apoptosis, transcriptional regulation and protein-protein interactions
			Zinc finger, RING/FYVE/PHD-type
40	TraesCS4A02G102200	Ankyrin repeat-containing domain superfamily protein	Ankyrin repeat	Involved in resistance mechanisms
			Ankyrin repeat-containing domain superfamily
41	TraesCS4A02G102300	Ankyrin repeat-containing domain superfamily protein	Ankyrin repeat	Involved in resistance mechanisms
			Ankyrin repeat-containing domain superfamily
44	TraesCS4A02G102900	Serine/threonine-protein kinase	Protein kinase domain	Similar to Tan spot necrotrophic effector ToxA sensitivity gene Tsn1, involved in plant–pathogen interaction and defence responses
			Protein kinase, ATP binding site
			Serine/threonine-protein kinase, active site
45	TraesCS4A02G106300	Peroxidase	Peroxidase, active site	Involved in defence response, potential susceptibility factor, negatively regulate wheat resistance to Blumeria graminis f. sp. Tritici
			Peroxidases heam-ligand binding site
48	TraesCS4A02G110800	P-loop NTPase	P-loop containing nucleoside triphosphate hydrolase	Regulate activity of the R proteins, defence response
50	TraesCS4A02G111100	P-loop NTPase	P-loop containing nucleoside triphosphate hydrolase	Regulate activity of the R proteins, defence response
56	TraesCS4A02G127600	F-box domain family protein	F-box domain	Regulates cell death and defence responses
			F-box protein AUF1-like
			F-box-like domain superfamily
58	TraesCS5A02G542800	Zinc finger C2H2 superfamily protein	Zinc finger C2H2 superfamily	Involved in plant stress tolerance, apoptosis, transcriptional regulation and protein-protein interactions
			Zinc finger C2H2-type
			Zinc finger protein JAGGED/KNUCKLES-like
62	TraesCS5A02G542700	Serine/threonine-protein kinase	Protein kinase domain	Similar to Tan spot necrotrophic effector ToxA sensitivity gene Tsn1, involved in plant–pathogen interaction and defence responses
			Protein kinase-like domain superfamily
			Protein kinase, ATP binding site
			Serine/threonine-protein kinase, active site
			Zinc finger, RING/FYVE/PHD-type
65	TraesCS6B02G149800	F-box domain family protein	F-box domain	Regulates cell death and defence responses
			F-box-like domain superfamily
73	TraesCS6B02G204600	Serine/threonine-protein kinase	Protein kinase domain	Similar to Tan spot necrotrophic effector ToxA sensitivity gene Tsn1, involved in plant–pathogen interaction and defence responses
			Protein kinase-like domain superfamily
			Protein kinase, ATP binding site
			Serine-threonine/tyrosine-protein kinase, catalytic domain
			Serine/threonine-protein kinase, active site
78	TraesCS6B02G205900	ABC transporter family protein	ABC transporter family protein	Durable resistance against multiple fungal pathogens
			ABC transporter family G domain
			ABC transporter-like, ATP-binding domain
			ABC-2 type transporter
			ABC-transporter, N-terminal domain
			P-loop containing nucleoside triphosphate hydrolase
81	TraesCS6B02G207100	P-loop NTPase	P-loop containing nucleoside triphosphate hydrolase	Regulate activity of the R proteins, defence response
83	TraesCS6B02G209400	ATPase	NB-ARC	Regulate activity of the R proteins, defence response
			P-loop containing nucleoside triphosphate hydrolase
85	TraesCS7B02G439900	P-loop NTPase	P-loop containing nucleoside triphosphate hydrolase	Regulate activity of the R proteins, defence response
89	TraesCS7B02G438400	Cytochrome P450, E-class, group I protein	Cytochrome P450	Enhance resistance to mycotoxin deoxynivalenol in wheat
			Cytochrome P450 superfamily
			Cytochrome P450, conserved site
			Cytochrome P450, E-class, group I
94	TraesCS7A02G474200	Plant peroxidase	Peroxidase, active site	Involved in defence response, potential susceptibility factor, negatively regulate wheat resistance to Blumeria graminis f. sp. Tritici
			Peroxidases heam-ligand binding site
			Plant peroxidase
95	TraesCS7A02G474400	Plant peroxidase	Peroxidase, active site	Involved in defence response, potential susceptibility factor, negatively regulate wheat resistance to Blumeria graminis f. sp. Tritici
			Peroxidases heam-ligand binding site
			Plant peroxidase
